# Supplementary material for: One-step synthesis of nitrogen, sulfur co-doped carbon nanodots and application for Fe3+ detection
Source: Royal Society of Chemistry journal article supplement (doi:10.1039/c8tb00193f), 2018-01-01
Supplement: c8tb00193f1.pdf [file c8tb00193f1.pdf]

## **One-step synthesis of nitrogen, sulfur co-doped carbon nanodots and application for Fe<sup>3+</sup> detection**

Xingwang Qie,<sup>a,b</sup> Minghui Zhan<sup>c</sup>, Peng Miao<sup>a</sup>, Li Li<sup>\*a</sup>, Zhimin Chang<sup>a</sup>, Mingfeng Ge<sup>a</sup>,  
Ping Gui<sup>b</sup>, Yuguo Tang<sup>a</sup>, Wen-Fei Dong<sup>\*a</sup>

<sup>a</sup>CAS Key Laboratory of Bio-Medical Diagnostics, Suzhou Institute of Biomedical Engineering and Technology, Chinese Academy of Sciences, Suzhou 215163, PR China

<sup>b</sup>University of Science and Technology of China, Hefei 230026, PR China

<sup>c</sup>Key Laboratory of Artificial Micro- and Nano-Structures of Ministry of Education, School of Physics and Technology, Wuhan University, Wuhan 430072, P. R. China.

---

\* Corresponding authors.

E-mail addresses: jlu\_li@163.com (L. Li), wenfeidong@126.com (W. Dong).

## Supplementary Figures and Tables

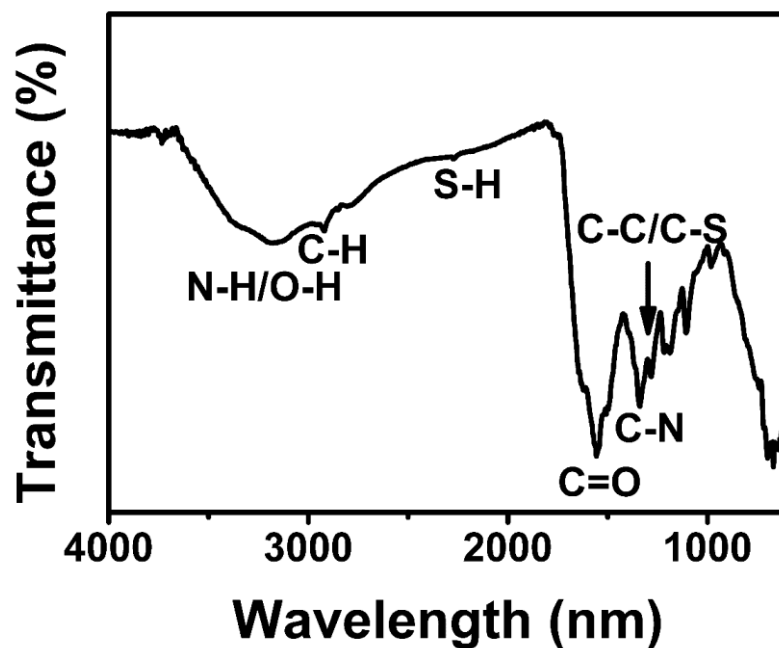

**Figure S1.** FTIR spectrum of the prepared N, S-CDs

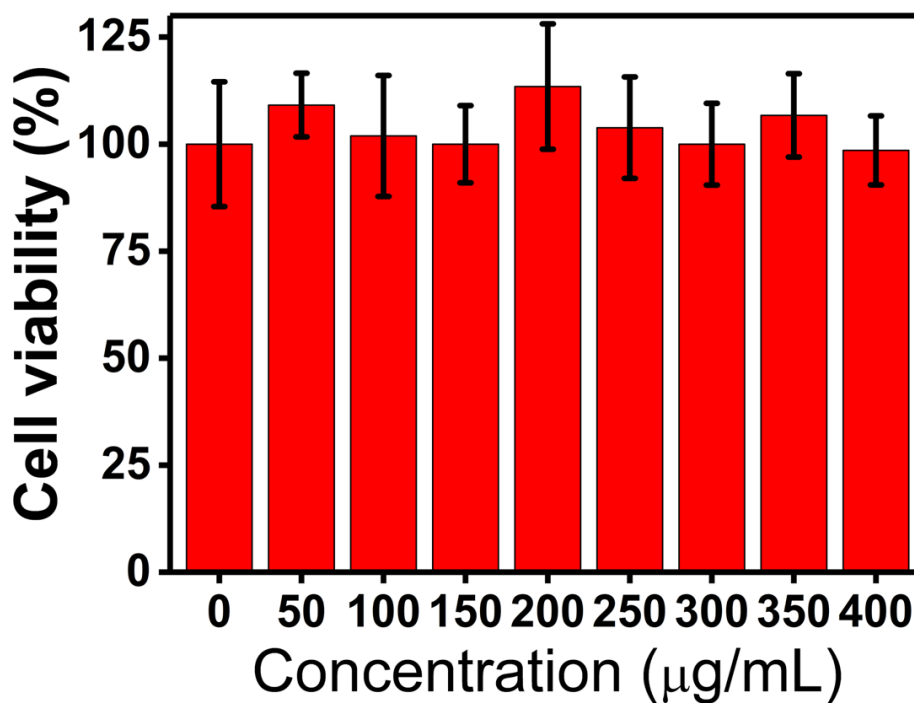

**Figure S2.** Cell viability assay of HeLa S3 cells treated with different concentrations of N, S-CDs.

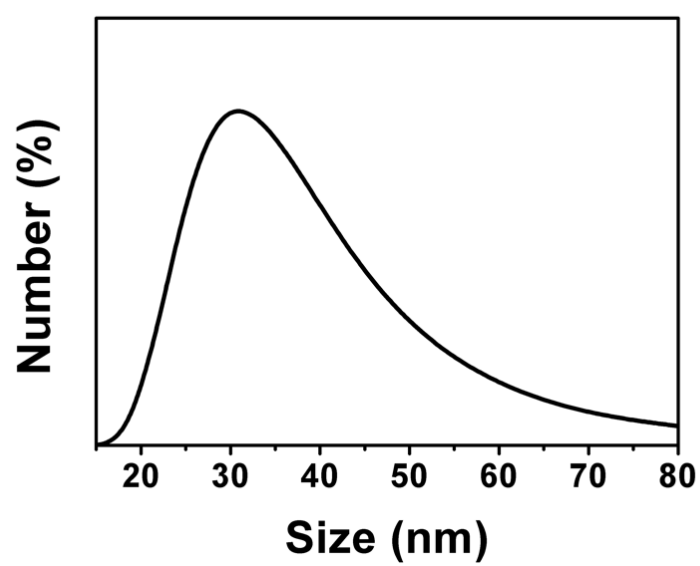

**Figure S3.** DLS spectrum of the prepared N, S-CDs with  $\text{Fe}^{3+}$ .

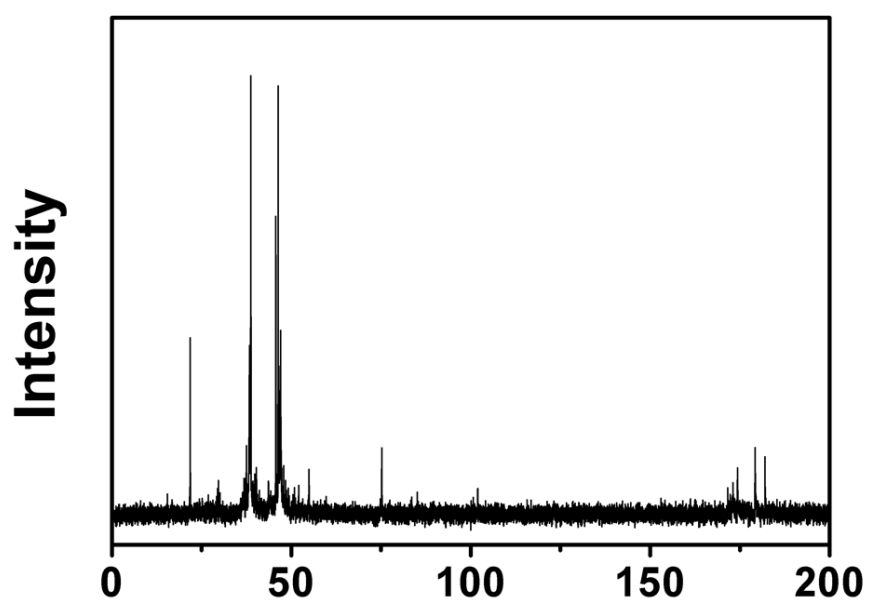

**Figure S4.**  $^{13}\text{C}$  NMR spectrum of N, S-CDs.

**Table S1.** Fluorescence quantum yield of N, S-CDs prepared from different reaction ratios for 8 h.

| Sample | mCA : mThiourea | QY (%) |
|--------|-----------------|--------|
| 1      | 2:1             | 10     |
| 2      | 1:1             | 15     |
| 3      | 2:1             | 14     |

**Table S2.** Fluorescence quantum yield of N, S-CDs prepared from different reaction time with the reaction ratio of 1:1.

| Sample | Reaction time (h) | QY (%) |
|--------|-------------------|--------|
| 1      | 6                 | 12.1   |
| 2      | 8                 | 15     |
| 3      | 10                | 13.5   |

**Table S3.** Comparison of the detection limit of prepared CDs-based nanosensor with other reported Fe<sup>3+</sup> nanosensors.

| probe                 | Linear range (μM) | Detection limit (μM) | References |
|-----------------------|-------------------|----------------------|------------|
| Graphene quantum dots | Less than 80      | 7.22                 | 1          |
| CDs                   | 0-20              | 0.32                 | 2          |
| CDs                   | 0-7.0             | 0.2                  | 3          |
| S-CDs                 | 1.0-500           | 0.1                  | 4          |
| N, S-CDs              | 25-500            | 4                    | 5          |
| N, S-CDs              | 0.1-3.5           | 0.0173               | This study |

## References:

1. B. Shi, Y. Su, L. Zhang, M. Huang, R. Liu and S. Zhao, *ACS applied materials & interfaces*, 2016, **8**, 10717-10725.
2. K. Qu, J. Wang, J. Ren and X. Qu, *Chemistry-A European Journal*, 2013, **19**, 7243-7249.
3. R. Liu, M. Gao, J. Zhang, Z. Li, J. Chen, P. Liu and D. Wu, *RSC Advances*, 2015, **5**, 24205-24209.
4. Q. Xu, P. Pu, J. Zhao, C. Dong, C. Gao, Y. Chen, J. Chen, Y. Liu and H. Zhou, *Journal of Materials Chemistry A*, 2015, **3**, 542-546.
5. H. Ding, J.-S. Wei and H.-M. Xiong, *Nanoscale*, 2014, **6**, 13817-13823.
